# Supplementary material for: Rhodium porphyrin complexes as catalysts for ammonia borane hydrolytic dehydrogenation
Source: Royal Society of Chemistry journal article supplement (doi:10.1039/d5dt02559a), 2026-01-01
Supplement: d5dt02559a1.pdf [file d5dt02559a1.pdf]

## Supporting Information

### **Rhodium Porphyrin Complexes as Catalysts for Ammonia Borane Hydrolytic Dehydrogenation**

Manuel Minnucci,<sup>a</sup> Ilaria Barlocco,<sup>a</sup> Laura Prati,<sup>a</sup> Marta Stucchi,<sup>a</sup> Alberto Villa,<sup>a</sup> Gabriele Di Carlo,<sup>\*a,b</sup> Francesca Tessore<sup>a,b</sup>

<sup>a</sup>*Dipartimento di Chimica, Università degli Studi di Milano, via Golgi 19 20133 Milano, Italy;*

<sup>b</sup>*Consorzio Interuniversitario nazionale per la Scienza e la Tecnologia dei Materiali (INSTM), via Giusti 9, 50121 Firenze, Italy.*



Elemental analysis for all 4 catalysts was carried out with a Perkin-Elmer CHN 2400 instrument.

- TPyP\_Rh ( $C_{44}H_{42}N_8O_6Rh$ )  
Anal. Calcd. (found): C, 59.93 (59.62); H, 4.80 (4.92); N, 12.71 (12.66)
- TMAP\_Rh ( $C_{56}H_{66}N_8O_6Rh$ )  
Anal. Calcd. (found): C, 64.05 (67.15); H, 6.34 (6.67); N, 10.67 (11.24)
- TSP\_Rh ( $C_{44}H_{26}N_4O_{14}S_4RhNa_4$ )  
Anal. Calcd. (found): C, 45.65 (45.45); H 2.26 (2.29); N, 4.84 (4.81)
- TAP\_Rh ( $C_{44}H_{32}N_8ClRh$ )  
Anal. Calcd. (found): C, 65.15 (64.96); H 3.98 (4.01); N, 13.81 (13.76)

Elemental analyses of the ionic rhodium–porphyrin catalysts (TPyP\_Rh, TMAP\_Rh and TSP\_Rh), purified on an  $H_2O/NaOH$  (pH 10) column, are consistent with the formation of axially dihydroxo-coordinated species, with  $OH^-$  as counterions for the cationic complexes and  $Na^+$  for the anionic TSP\_Rh. The slightly higher H content and the lower C and N values observed for TPyP\_Rh and TSP\_Rh are attributed to their hygroscopic nature. In contrast, TMAP\_Rh shows higher C/H/N percentages likely ascribed to the lower Rh content, compared to the theoretical one, as revealed by ICP analysis. The neutral, non-hygroscopic TAP\_Rh displays elemental values in excellent agreement with the calculated composition.

#### TPyP\_H2

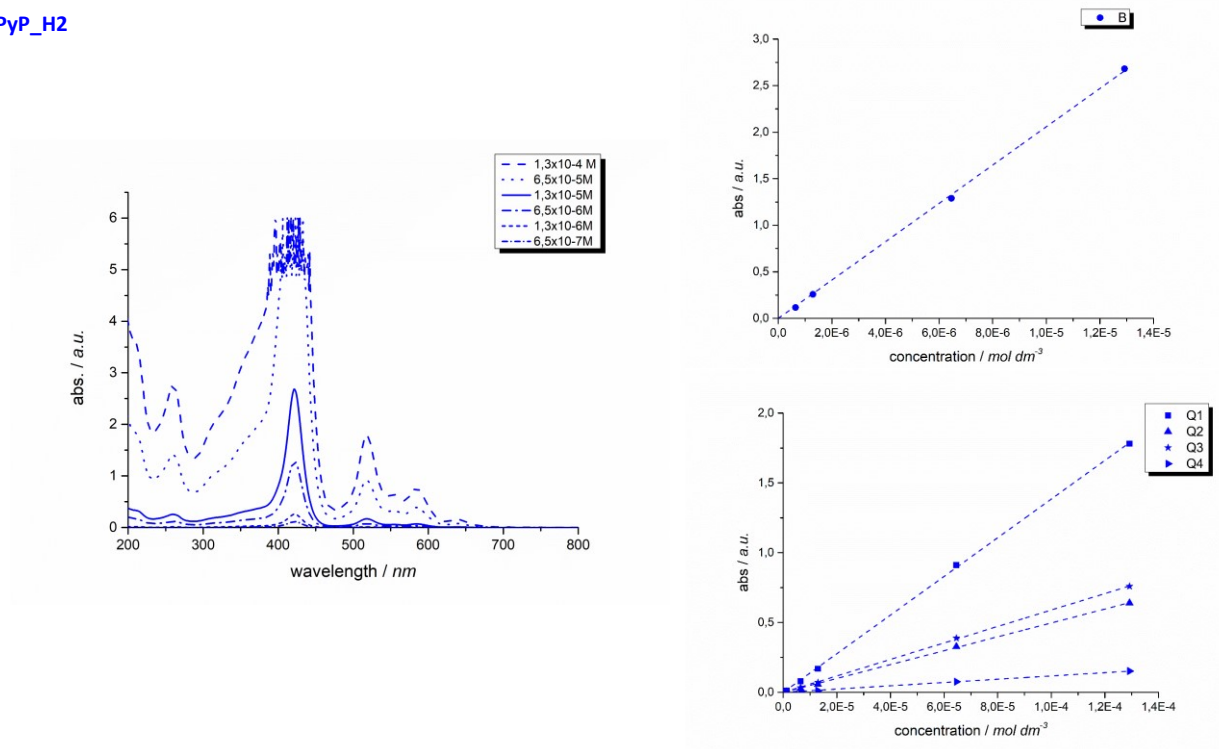

**Figure S1.** UV-Vis spectra of TPyP\_H2 in  $H_2O$  at various concentrations and Lambert-Beer curve for B and Q bands



### TMPyP\_Rh

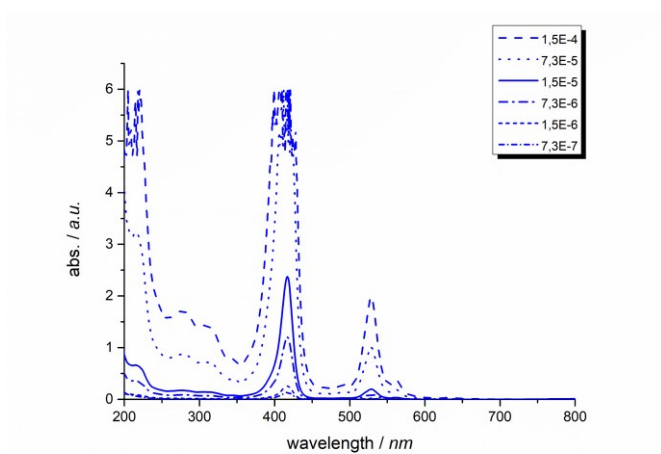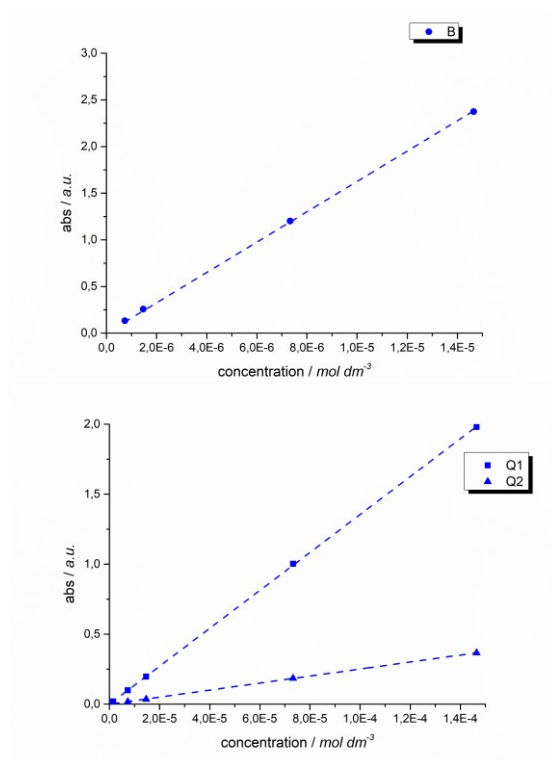

**Figure S2.** UV-Vis spectra of TMPyP\_Rh in H<sub>2</sub>O at various concentrations and Lambert-Beer curve for B and Q bands

### TMAP\_H2

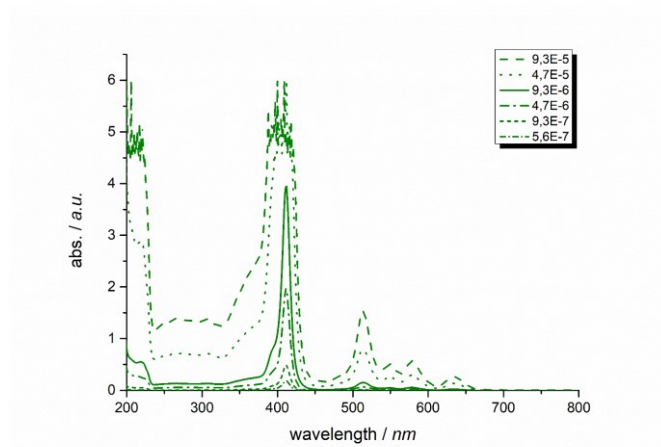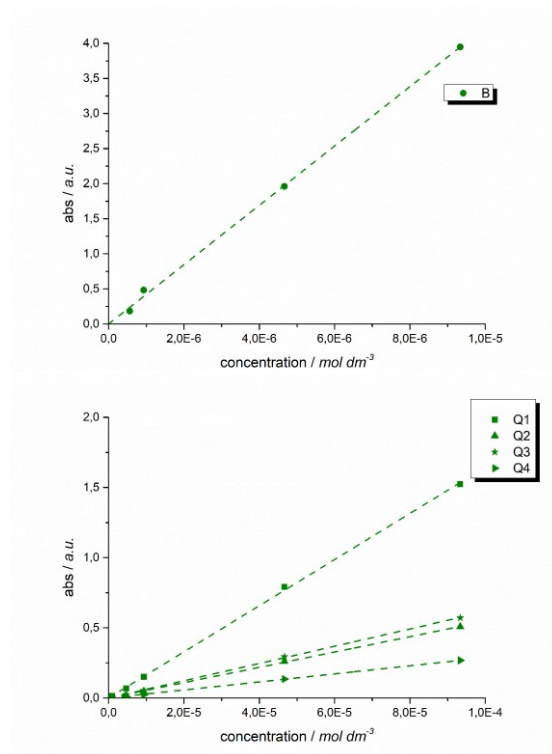

**Figure S3.** UV-Vis spectra of TMAP\_H<sub>2</sub> in H<sub>2</sub>O at various concentrations and Lambert-Beer curve for B and Q bands



## TMAP\_Rh

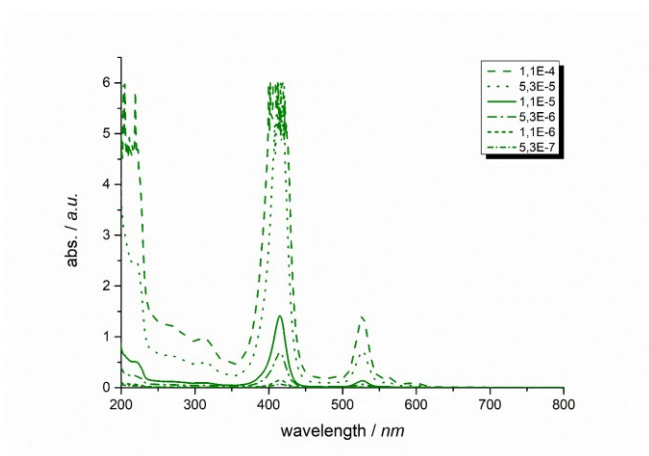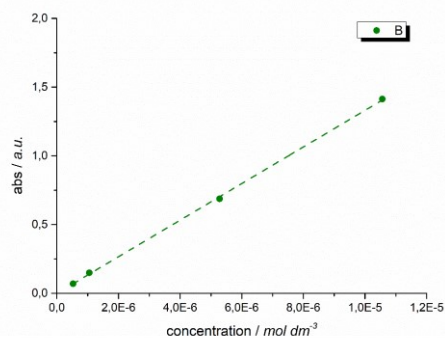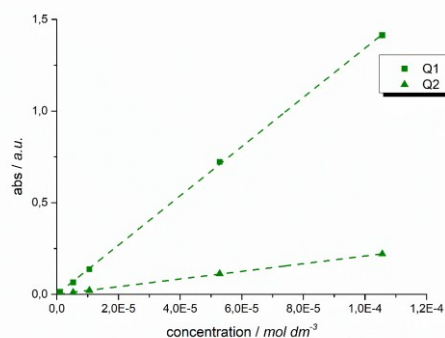

**Figure S4.** UV-Vis spectra of TMAP\_Rh in H<sub>2</sub>O at various concentrations and Lambert-Beer curve for B and Q bands

## TSP\_H2

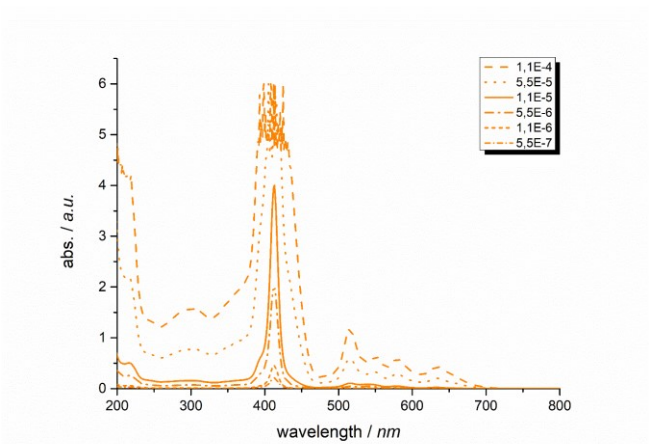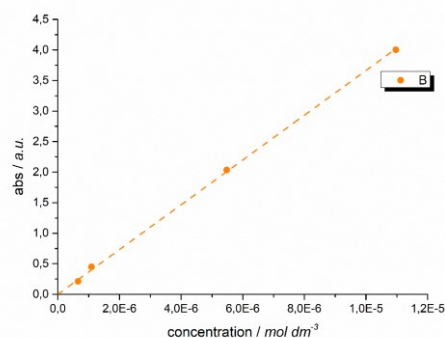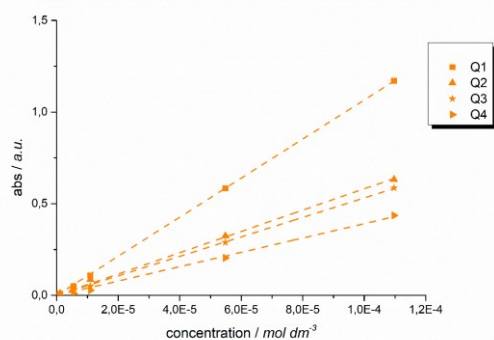

**Figure S5.** UV-Vis spectra of TSP\_H<sub>2</sub> in H<sub>2</sub>O at various concentrations and Lambert-Beer curve for B and Q bands



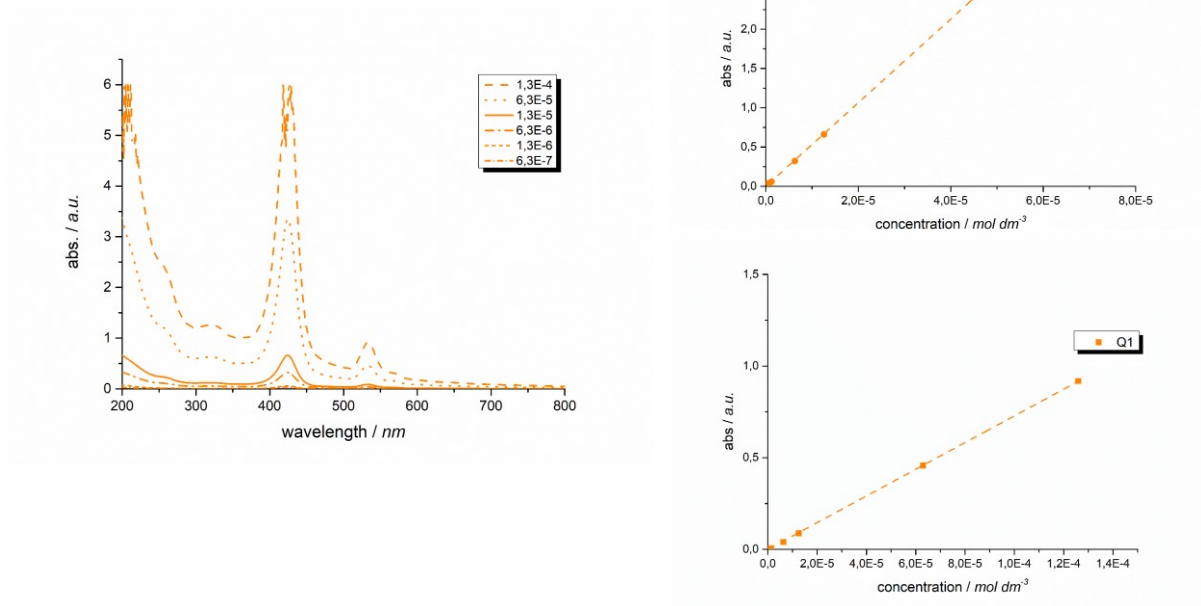

**Figure S6.** UV-Vis spectra of TSP\_Rh in H<sub>2</sub>O at various concentrations and Lambert-Beer curve for B and Q bands

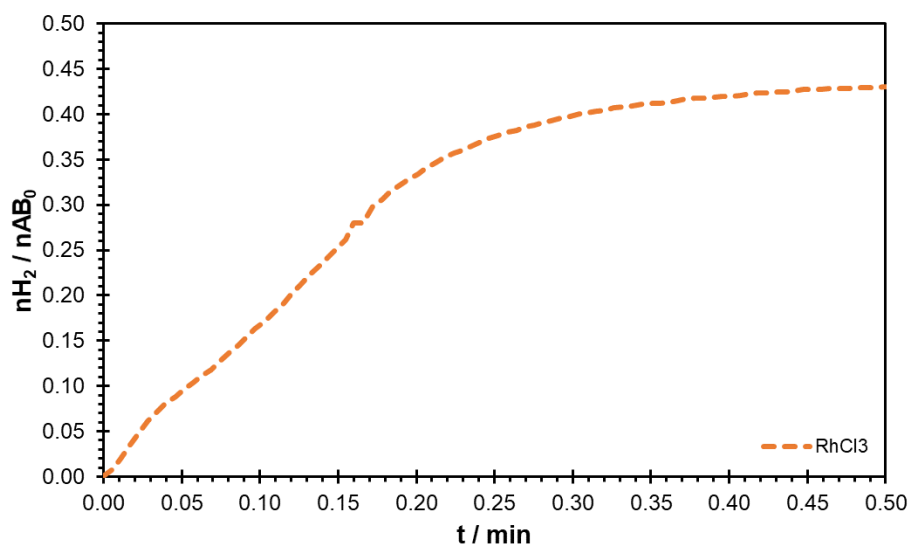

**Figure S7.** kinetic profile of the RhCl<sub>3</sub> \* 3H<sub>2</sub>O employed in the metalation process. Tested at 30 °C, 1400 rpm, AB/Cat molar ration 1000/1 and 0.4 mmol of AB.



TAP\_H<sub>2</sub>

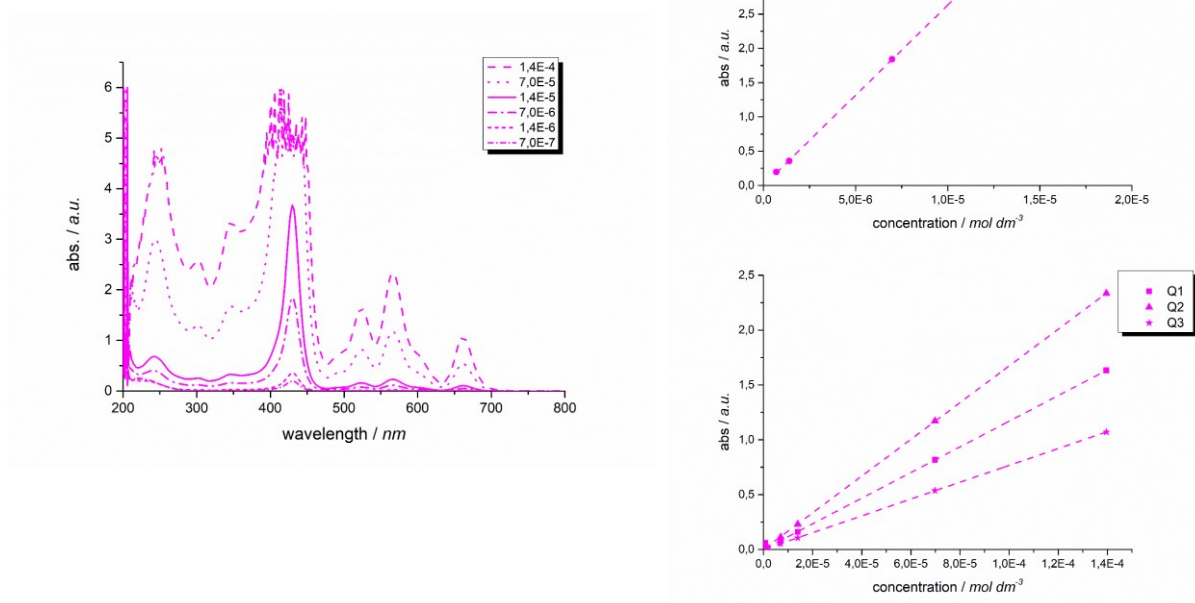

**Figure S8.** UV-Vis spectra of TAP\_H<sub>2</sub> in THF at various concentrations and Lambert-Beer curve for B and Q bands

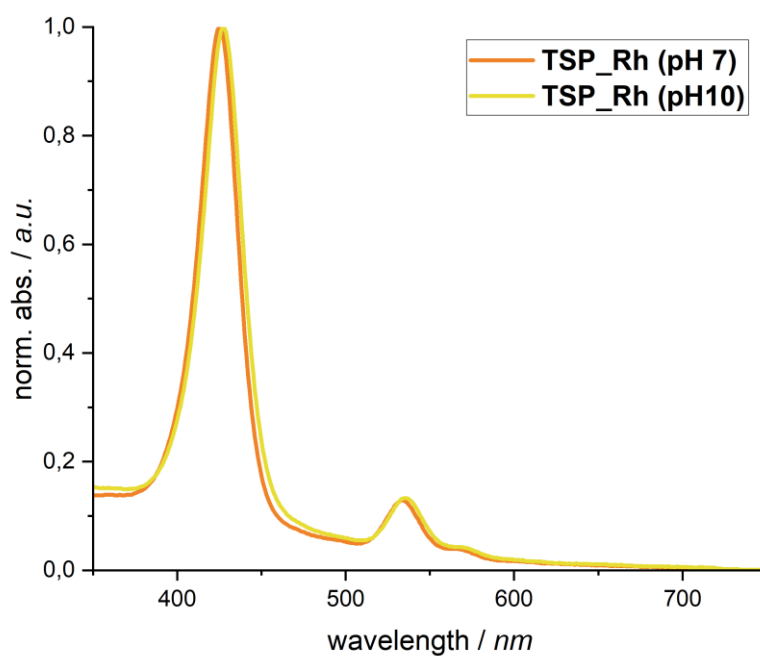

**Figure S9.** Comparison of UV-Vis spectra of pristine TSP\_Rh at pH 7 and pH 10



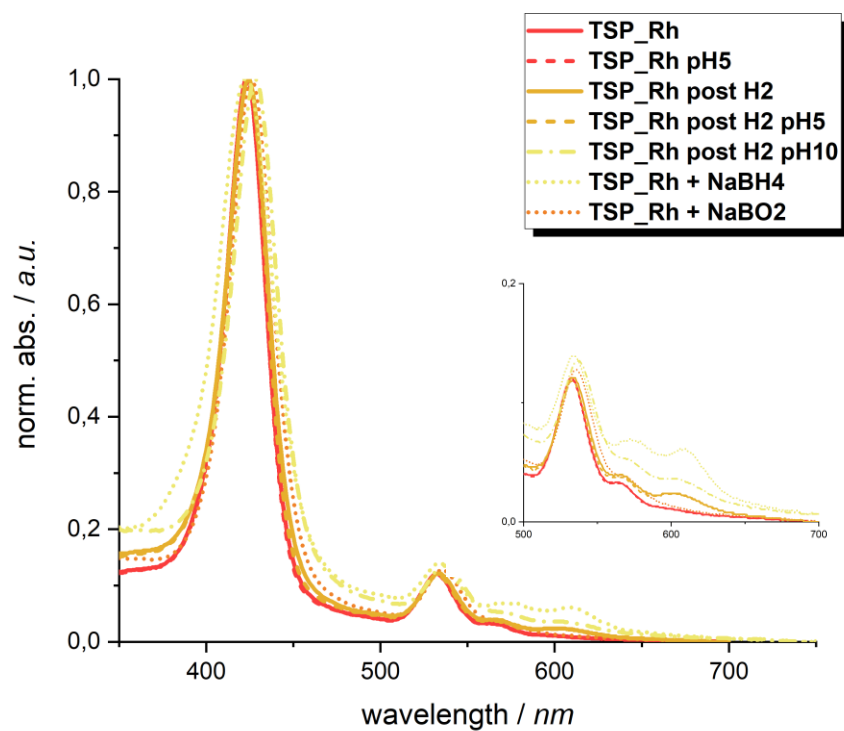

**Figure S10.** UV-Vis spectra of TSP\_Rh after treatment with H<sub>2</sub> for 2h, addition of NaBH<sub>4</sub> and addition of NaBO<sub>2</sub>

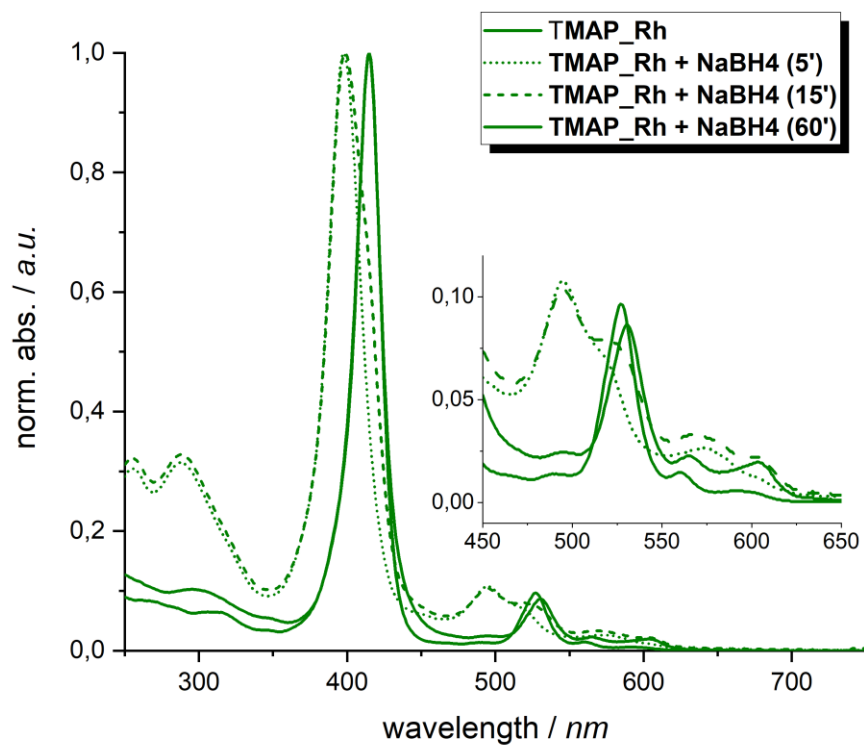

**Figure S11.** UV-Vis spectra of TMAP\_Rh after addition of NaBH<sub>4</sub> at different times
